# Supplementary material for: A 2-Year Retrospective Case Series on Isolates of the Emerging Pathogen Actinotignum schaalii from a Canadian Tertiary Care Hospital
Source: MDPI journal article supplement (doi:10.3390/microorganisms10081608), 2022-08-09
Supplement: s1 [file s1]

# **Supplementary Sheet: A 2-year Retrospective Case Series on isolates of the Emerging Pathogen *Actinotignum schaalii* from a Canadian tertiary care hospital**

**Authors:**

Pramath Kakodkar, and Camille Hamula

**Affiliation:**

*Department of Pathology and Laboratory Medicine, University of Saskatchewan, Canada*

**Corresponding Author:**

Camille Hamula

**Disclosures:** The authors declare no conflicts of interest

**Financial Support:** Not applicable

**Table S1:** Summary of Comorbidities in our case series.

|                       | <b>Comorbidity (Procedure)</b>                                    | <b><i>n</i></b> |
|-----------------------|-------------------------------------------------------------------|-----------------|
| Endocrine (25)        | Hyperthyroidism                                                   | 1               |
|                       | Hypothyroidism                                                    | 6               |
|                       | Type 2 Diabetes Mellitus                                          | 9               |
|                       | Systemic Lupus erythematosus                                      | 1               |
|                       | Obesity/obstructive sleep apnea                                   | 8               |
| Psychiatric (13)      | Anxiety                                                           | 2               |
|                       | Depression                                                        | 2               |
|                       | Dementia/Delirium                                                 | 9               |
| Gastroenterology (24) | Pancreatitis                                                      | 1               |
|                       | Gastroesophageal reflux disease                                   | 9               |
|                       | Cirrhosis                                                         | 1               |
|                       | Cholecystectomy                                                   | 2               |
|                       | Hernia                                                            | 2               |
|                       | Hemorrhoids (hemorrhoidectomy)                                    | 2               |
|                       | diverticulitis (colostomy)                                        | 2               |
|                       | Inflammatory bowel disease (subtotal colectomy and end-ileostomy) | 2               |
|                       | Appendectomy                                                      | 3               |
| Renal (7)             | Renal Failure                                                     | 5               |
|                       | Gout                                                              | 2               |
| Woman's' health (5)   | Breast cancer                                                     | 1               |
|                       | Gynecology procedures                                             | 4               |
| Others (11)           | Arthritis                                                         | 6               |
|                       | Chronic obstructive pulmonary disease                             | 4               |
|                       | Foot cellulitis                                                   | 1               |
| Hematology (17)       | Deep vein thrombosis                                              | 1               |
|                       | Provoked pulmonary embolism                                       | 2               |
|                       | Anemia                                                            | 3               |
|                       | Superficial arm thrombophlebitis                                  | 2               |
|                       | Peripheral vascular disease                                       | 1               |
| Urology (12)          | Urolithiasis                                                      | 1               |
|                       | Urinary tract infection                                           | 3               |
|                       | Bladder pathologies                                               | 3               |
|                       | BPH                                                               | 3               |
|                       | Prostate ca                                                       | 2               |
| Orthopedic (3)        | Knee replacement                                                  | 1               |
|                       | Hip fracture                                                      | 2               |
| Cardiology (29)       | Heart failure with reduced ejection fraction                      | 4               |
|                       | hypertension                                                      | 16              |
|                       | Aortic Dissection                                                 | 1               |
|                       | Abdominal aortic aneurysm                                         | 1               |
|                       | Atrial fibrillation                                               | 5               |
|                       | Coronary artery disease                                           | 2               |
| Neurology (14)        | Cerebral vascular accident/ transient ischemic attack             | 4               |

|  |                    |   |
|--|--------------------|---|
|  | Movement disorders | 7 |
|  | Cerebral palsy     | 1 |
|  | Spina bifida       | 2 |

**Table S2:** Literature review summary of *A. schaalii* urological infections.

| Age                                                                                                              | Diagnosis                   | Mono/polymicrobial;<br>organism                                                                                                                                                                               | Treatment                                                                                                                                                                                                | References                              |
|------------------------------------------------------------------------------------------------------------------|-----------------------------|---------------------------------------------------------------------------------------------------------------------------------------------------------------------------------------------------------------|----------------------------------------------------------------------------------------------------------------------------------------------------------------------------------------------------------|-----------------------------------------|
| <b>Pyelonephritis (12)</b> , Mean = 51±24.8, M:F (8:4), Blood (5), Urine (6), Aspirate (1)                       | Pyelonephritis (12)         | Mono (8), Poly (4);<br><i>Bacteroides fragilis</i> ,<br><i>Escherichia coli</i> , <i>Candida albicans</i> , , <i>Peptoniphilus asaccharolyticus</i> ,<br><i>Actinomyces odontolyticus</i> .                   | Ampicillin (3), Amoxiclav (2), ciprofloxacin (2), PIP-TZM (2), CTX, gentamicin, Amoxicillin, Vancomycin, TMP-SMX, Nephrostomy (2), JJ stent (2), Pyeloplasty, Surgical drainage, Nephrectomy             | [1], [2], [3], [4], [5], [6], [7],[8] * |
| <b>UTI (65)</b> , Mean = 73±2.9, M:F (39:26), Urine (45), Blood (7), Urine and blood (6), Aspirate (), Semen (2) | UTI unspecified (17)        | Mono (9), Poly (8);<br><i>Klebsiella pneumonia</i> ,<br><i>Corynebacterium</i> ,<br><i>Aerococcus sanguinicola</i> ,<br>Urethral flora, Gram+ve mixed flora (3), CoNS                                         | PIP-TZM (3), erythromycin, Ciprofloxacin (5), Metronidazole (2), Clindamycin, Fosfomycin, cefuroxime, Amoxiclav (2), Cefotaxime (4), Cefadroxil, Levofloxacin, CTX, Cephalexin, Ceftazidime, gentamicin, | [9], [10], [11], [12],                  |
|                                                                                                                  | Acute urinary retention (7) | Mono (3), Poly (4);<br><i>Aerococcus urinae</i> (2),<br><i>Escherichia coli</i> ,<br><i>Enterobacter cloacae</i> ,<br>Urethral flora                                                                          | Ciprofloxacin, Cefotaxime (3), amoxicillin, suprapubic catheterization.                                                                                                                                  | [9], [13]                               |
|                                                                                                                  | Prostatitis (9)             | Mono (4), Poly (5);<br><i>Escherichia coli</i> (2),<br><i>Actinomyces neuui</i> ,<br><i>Pseudomonas aeruginosa</i> ,<br><i>Candida glabrata</i>                                                               | Cefixime, Ceftriaxone, amoxiclav (3), Doxycycline, amoxicillin (4), Ciprofloxacin (3), Azithromycin, Penicillin G, cefpodoxime                                                                           | [4], [14], [12], [15]                   |
|                                                                                                                  | Cystitis (17)               | Mono (9), Poly (8);<br><i>Aerococcus urinae</i> ,<br><i>Staphylococcus aureus</i> ,<br><i>Escherichia coli</i> (2),<br><i>Citrobacter koseri</i> ,<br><i>Klebsiella pneumoniae</i> ,<br><i>Staphylococcus</i> | Nitrofurantoin, ampicillin, Cefuroxime, Amoxicillin (3), Amdinocillin, TMP-SMX (2), Amoxiclav (3), Ciprofloxacin (2), Norfloxacin, Pivampicillin                                                         | [13], [2], [16], [17], [18], [4]        |

|  |                                                           |                                                   |                                                            |           |
|--|-----------------------------------------------------------|---------------------------------------------------|------------------------------------------------------------|-----------|
|  |                                                           | <i>epidermidis</i> , <i>Enterococcus faecalis</i> | (2), mecillinam, CTX, catheter change                      |           |
|  | Dementia (6)                                              | Mono (5), Poly (1); <i>Aerococcus urinae</i>      | Metronidazole (2), CTX, Amoxicillin, Cefuroxime            | [13], *   |
|  | Neurogenic bladder (3)                                    | Mono (3)                                          | Amoxiclav (2), TMP-SMX, Amoxicillin                        | [19], *   |
|  | Urethritis (2)                                            | Mono (2)                                          | Amoxicillin (2)                                            | [4]       |
|  | Bladder Necrosis (non-muscle-invasive bladder cancer) (2) | Mono (2)                                          | Amoxicillin (2)                                            | [4], [20] |
|  | Bladder Prolapse (2)                                      | Mono (1), Poly (1); <i>Aerococcus urinae</i>      | Cystoscopy (2), Amoxicillin, Nitrofurantoin, Ciprofloxacin | *         |

\*Patients included from our case series.

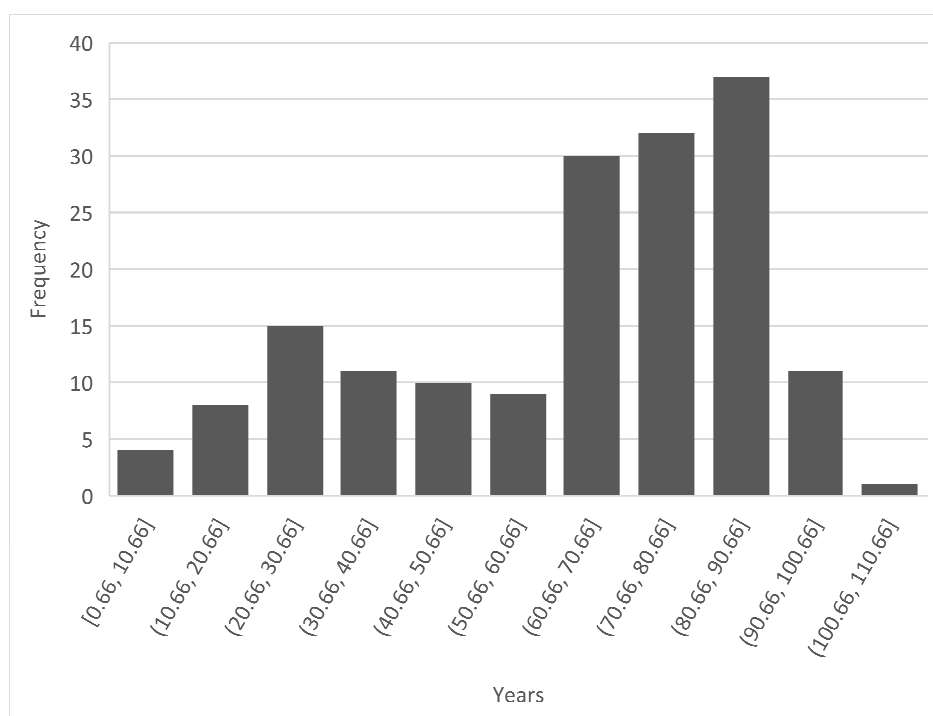

**Supplementary Figure S1:** Population distribution of patient cohort from the Literature review (n=134)

## References

1. Lawson, P.A., et al., *Characterization of some Actinomyces-like isolates from human clinical specimens: reclassification of Actinomyces suis (Soltys and Spratling) as Actinobaculum suis comb. nov. and description of Actinobaculum schaalii sp. nov.* Int J Syst Bacteriol, 1997. **47**(3): p. 899-903.
2. Reinhard, M., et al., *Ten cases of Actinobaculum schaalii infection: clinical relevance, bacterial identification, and antibiotic susceptibility.* J Clin Microbiol, 2005. **43**(10): p. 5305-8.
3. Barberis, C., et al., *Actinobaculum schaalii causing urinary tract infections: report of four cases from Argentina.* J Infect Dev Ctries, 2014. **8**(2): p. 240-4.
4. Lotte, L., et al., *Infections related to Actinotignum schaalii (formerly Actinobaculum schaalii): a 3-year prospective observational study on 50 cases.* Clin Microbiol Infect, 2016. **22**(4): p. 388-390.
5. Gupta, A., P. Gupta, and A. Khaira, *Actinobaculum schaalii pyelonephritis in a kidney allograft recipient.* Iran J Kidney Dis, 2012. **6**(5): p. 386-8.
6. Pajkrt, D., et al., *Pyelonephritis caused by Actinobaculum schaalii in a child with pyeloureteral junction obstruction.* Eur J Clin Microbiol Infect Dis, 2003. **22**(7): p. 438-40.
7. Vallet, A., et al., *Recurrent obstructive acute pyelonephritis: A rare form of Actinotignum (Actinobaculum) schaalii infection in a HIV-1 infected patient.* Anaerobe, 2017. **43**: p. 75-77.
8. Kitano, H., et al., *Case Report: Emphysematous Pyelonephritis With a Congenital Giant Ureterocele.* Front Pediatr, 2021. **9**: p. 775468.
9. Sandlund, J., et al., *Bacteraemia caused by Actinobaculum schaalii: An overlooked pathogen?* Scand J Infect Dis, 2014. **46**(8): p. 605-8.
10. Larios, O.E., et al., *First report of Actinobaculum schaalii urinary tract infection in North America.* Diagn Microbiol Infect Dis, 2010. **67**(3): p. 282-5.
11. Vasquez, M.A., et al., *Actinobaculum schaalii recurrent urinary infection in a centenarian patient.* Geriatr Gerontol Int, 2013. **13**(3): p. 807-8.
12. Gomez, E., et al., *Actinobaculum bacteremia: a report of 12 cases.* Journal of clinical microbiology, 2011. **49**(12): p. 4311-4313.
13. Bank, S., et al., *A validation of the Danish microbiology database (MiBa) and incidence rate of Actinotignum schaalii (Actinobaculum schaalii) bacteraemia in Denmark.* Clin Microbiol Infect, 2015. **21**(12): p. 1097.e1-4.
14. Siller Ruiz, M., et al., *Unusual clinical presentations of Actinotignum (Actinobaculum) schaalii infection.* Enferm Infecc Microbiol Clin, 2017. **35**(3): p. 197-198.
15. van Aarle, S., N.L.A. Arents, and K. de Laet, *Actinobaculum schaalii causing epididymitis in an elderly patient.* J Med Microbiol, 2013. **62**(Pt 7): p. 1092-1093.
16. Haller, P., et al., *Vertebral osteomyelitis caused by Actinobaculum schaalii: a difficult-to-diagnose and potentially invasive uropathogen.* Eur J Clin Microbiol Infect Dis, 2007. **26**(9): p. 667-70.
17. Sturm, P.D., et al., *Urosepsis with Actinobaculum schaalii and Aerococcus urinae.* J Clin Microbiol, 2006. **44**(2): p. 652-4.
18. Andersen, L.B., et al., *Actinobaculum schaalii, a cause of urinary tract infections in children?* Acta Paediatr, 2012. **101**(5): p. e232-4.
19. Zimmermann, P., et al., *Actinobaculum schaalii an emerging pediatric pathogen?* BMC Infect Dis, 2012. **12**: p. 201.
20. Lotte, R., et al., *A rare case of histopathological bladder necrosis associated with Actinobaculum schaalii: the incremental value of an accurate microbiological diagnosis using 16S rDNA sequencing.* Anaerobe, 2014. **26**: p. 46-8.
